# Supplementary material for: Core outcome set in paediatric sepsis in low- and middle-income countries: a study protocol
Source: PubMed Central journal article supplement — BMJ Open. 2020 Apr 6;10(4):e034960. doi: 10.1136/bmjopen-2019-034960 (PMC7245395; doi:10.1136/bmjopen-2019-034960), 2020-04-06
Supplement: bmjopen-2019-034960supp001.pdf [file bmjopen-2019-034960supp001.pdf]

## Core Outcome Set-STAndards for Development: COS-STAD recommendations (15)

| DOMAIN                | STANDARD NUMBER | METHODOLOGY                                                                                | HOW STANDARD WAS OR WAS NOT MET                                                                                                                                                                                                                                                                                                                                                                                                                           | PAGE AND SECTION REPORTED                               |
|-----------------------|-----------------|--------------------------------------------------------------------------------------------|-----------------------------------------------------------------------------------------------------------------------------------------------------------------------------------------------------------------------------------------------------------------------------------------------------------------------------------------------------------------------------------------------------------------------------------------------------------|---------------------------------------------------------|
| Scope specification   | 1               | The research or practice setting(s) in which the COS is to be applied                      | Paediatric research in low- and middle-income countries                                                                                                                                                                                                                                                                                                                                                                                                   | Page 3. Scope of COS                                    |
|                       | 2               | The health condition(s) covered by the COS                                                 | Sepsis – multiple definitions as mentioned in text                                                                                                                                                                                                                                                                                                                                                                                                        | Page 3. Scope of COS                                    |
|                       | 3               | The population(s) covered by the COS                                                       | Paediatric - The population will include those from newborn up to under eighteen years of age.                                                                                                                                                                                                                                                                                                                                                            | Page 3. Scope of COS                                    |
|                       | 4               | The intervention(s) covered by the COS                                                     | All interventions related to paediatric sepsis in this setting will be applicable.                                                                                                                                                                                                                                                                                                                                                                        | Page 3. Type of studies, participants and interventions |
| Stakeholders involved | 5               | Those who will use the COS in research                                                     | Researchers working in LMIC in paediatric sepsis                                                                                                                                                                                                                                                                                                                                                                                                          | Page 4. Selection of panel members                      |
|                       | 6               | Healthcare professionals with experience of patients with the condition                    | Paediatricians and paediatric nurses working in LMIC                                                                                                                                                                                                                                                                                                                                                                                                      | Page 4. Selection of panel members                      |
|                       | 7               | Patients with the condition or their representatives                                       | Parents and guardians included of patients with previous sepsis in LMIC                                                                                                                                                                                                                                                                                                                                                                                   | Page 4. Selection of panel members                      |
| Consensus process     | 8               | The initial list of outcomes considered both healthcare professionals' and patients' views | Round two of the Delphi includes both health care professionals' and patient/parents' views                                                                                                                                                                                                                                                                                                                                                               | Page 4. Delphi process                                  |
|                       | 9               | A scoring process and consensus definition were described a priori.                        | A list of outcomes generated from the systematic review will then be presented, and the participants required to rank each one on a scale from 1 to 9. A score of 1 -3 indicates an unimportant outcome that should not be included, scores of 4 – 6 demonstrate an important but not critical outcome and scores of 7 - 9 imply an outcome that is essential to inclusion.                                                                               | Page 4. Delphi process                                  |
|                       | 10              | Criteria for including/dropping/adding outcomes were described a priori                    | Analysis of the second-round outcomes for which $\geq 70\%$ of panellists scored it 7–9 and fewer than 15% of panellists scored it 1–3 will have met criteria for inclusion in the consensus meeting discussion. Outcomes for which $\geq 70\%$ of panellists scored it 1–3, and fewer than 15% of panellists scored it 7–9 will be defined to have met consensus for exclusion. Those outcomes not meeting criteria will be defined as lack of consensus | Page 4. Delphi process                                  |
|                       | 11              | Care was taken to avoid ambiguity of language used in the list of outcomes.                | All patient and participant suggested outcomes will be added to the second round Delphi. All outcomes from the first round will be carried over.<br>The final list of outcomes will be reviewed by multiple healthcare professionals from around the world prior to commencement of the Delphi                                                                                                                                                            | Page 4. Delphi process                                  |

COS – Core outcome set
