# Supplementary material for: Core outcome set in paediatric sepsis in low- and middle-income countries: a study protocol
Source: PubMed Central journal article supplement — BMJ Open. 2020 Apr 6;10(4):e034960. doi: 10.1136/bmjopen-2019-034960 (PMC7245395; doi:10.1136/bmjopen-2019-034960), 2020-04-06
Supplement: bmjopen-2019-034960supp002.pdf [file bmjopen-2019-034960supp002.pdf]

## Core Outcome Set-STandardised Protocol Items: COS-STAP Statement (16)

| TITLE/ABSTRACT                   |     |                                                                                                                                                                                                                                                                                     | PAGE AND SECTION REPORTED                                  |
|----------------------------------|-----|-------------------------------------------------------------------------------------------------------------------------------------------------------------------------------------------------------------------------------------------------------------------------------------|------------------------------------------------------------|
| Title                            | 1a. | Identify in the title that the paper describes the protocol for the planned development of a COS                                                                                                                                                                                    | Page 1. Title                                              |
| Abstract                         | 1b. | Provide a structured abstract                                                                                                                                                                                                                                                       | Page 1. Abstract                                           |
| INTRODUCTION                     |     |                                                                                                                                                                                                                                                                                     |                                                            |
| Background and objectives        | 2a. | Describe the background and explain the rationale for developing the COS, and identify the reasons why a COS is needed and the potential barriers to its implementation                                                                                                             | Page 2. Background                                         |
| Scope                            | 2b. | Describe the specific objectives with reference to developing a COS                                                                                                                                                                                                                 | Page 2. Objectives                                         |
|                                  | 3a. | Describe the health condition(s) and population(s) that will be covered by the COS                                                                                                                                                                                                  | Page 2. Objectives                                         |
|                                  | 3b. | Describe the intervention(s) that will be covered by the COS                                                                                                                                                                                                                        | Page 2. Objectives                                         |
|                                  | 3c. | Describe the context of use for which the COS is to be applied                                                                                                                                                                                                                      | Page 2. Objectives                                         |
| METHODS                          |     |                                                                                                                                                                                                                                                                                     |                                                            |
| Stakeholders                     | 4.  | Describe the stakeholder groups to be involved in the COS development process, the nature and rationale for their involvement and also how the individuals will be identified; this should cover involvement both as members of the research team and as participants in the study. | Page 4. Delphi process                                     |
| Information sources              | 5a. | Describe the information sources that will be used to identify the list of outcomes. Outline the methods or reference other protocols/papers.                                                                                                                                       | Page 3. Systematic Review                                  |
|                                  | 5b. | Describe how outcomes may be dropped/combined with reasons                                                                                                                                                                                                                          | Page 4. Delphi process                                     |
| Consensus process                | 6.  | Describe the plans for how the consensus process will be undertaken                                                                                                                                                                                                                 | Page 4. Delphi process                                     |
| Consensus definition             | 7a. | Describe the consensus definition                                                                                                                                                                                                                                                   | Page 4. Delphi process                                     |
|                                  | 7b. | Describe the procedure for determining how outcomes will be added/combined/dropped from consideration during the consensus process.                                                                                                                                                 | Page 4. Delphi process                                     |
| ANALYSIS                         |     |                                                                                                                                                                                                                                                                                     |                                                            |
| Outcome scoring/feedback         | 8.  | Describe how outcomes will be scored and summarised, describe how participants will receive feedback during the consensus process                                                                                                                                                   | Page 4. Delphi process                                     |
| Missing data                     | 9.  | Describe how missing data will be handled during the consensus process                                                                                                                                                                                                              | Page 4. Delphi process                                     |
| ETHICS and DISSEMINATION         |     |                                                                                                                                                                                                                                                                                     |                                                            |
| Ethics approval/informed consent | 10. | Describe any plans for obtaining research ethics committee/ institutional review board approval in relation to the consensus process and describe how informed consent will be obtained (if relevant).                                                                              | Page 5. Ethics and dissemination                           |
| Dissemination                    | 11. | Describe any plans to communicate the results of study participants and COS users, inclusive of methods and timing of dissemination                                                                                                                                                 | Page 5. Implementation, dissemination and updating the COS |
| ADMINISTRATIVE INFORMATION       |     |                                                                                                                                                                                                                                                                                     |                                                            |
| Funders                          | 12. | Describe sources of funding, role of funders                                                                                                                                                                                                                                        | Page 6. Funding Statement                                  |
| Conflicts of interest            | 13. | Describe any potential conflicts of interest within the study team and how they will be managed.                                                                                                                                                                                    | Page 6. Competing interests                                |

COS – Core outcome set
