# Supplementary material for: Core outcome set in paediatric sepsis in low- and middle-income countries: a study protocol
Source: PubMed Central journal article supplement — BMJ Open. 2020 Apr 6;10(4):e034960. doi: 10.1136/bmjopen-2019-034960 (PMC7245395; doi:10.1136/bmjopen-2019-034960), 2020-04-06
Supplement: bmjopen-2019-034960supp004.pdf [file bmjopen-2019-034960supp004.pdf]

## Supplemental File 3

### Systematic Review Search Strategies

#### Criteria

- Inclusion:
  - Articles published in English
  - Peer Reviewed articles
  - Focus on paediatric patients with sepsis (those under 18 years of age)
  - Sepsis, severe sepsis or septic shock as defined by international consensus (International Consensus Conference on Pediatric Sepsis Definitions, American College of Chest Physicians/ Society of Critical Care Medicine consensus criteria, sepsis-relevant International Classification of Diseases (ICD)-9/ICD-10 codes), by IMCI and self-defined ( e.g. positive blood culture with one or more symptoms)
  - Involve research in low - middle income countries
  - Describe a clinical outcome that is measured systematically across the population studied
  - Years : 1994 to 2019
- Exclusion
  - Adult studies (>18 yrs.)
  - Preterm Sepsis
  - Those performed in high resource countries (as defined by the World Bank)
  - No outcome data
  - Articles which are not peer reviewed
  - Duplicate references
  - Studies missing methods of data collection and eligibility criteria
  - Studies involving sepsis in specific subgroup population
  - Retrospective bacteremia

#### Embase.com

('sepsis'/exp OR sepsis:ti,ab,kw OR septic:ti,ab,kw OR pyemia\*:ti,ab,kw OR pyohemia\*:ti,ab,kw OR pyaemia\*:ti,ab,kw OR septicemia\*:ti,ab,kw OR 'blood poisoning':ti,ab,kw) AND ('newborn'/exp OR 'pediatrics'/exp OR 'child'/exp OR 'adolescent'/exp OR infant\*:ti,ab,kw OR baby:ti,ab,kw OR babies:ti,ab,kw OR newborn\*:ti,ab,kw OR neonate\*:ti,ab,kw OR pediatric:ti,ab OR paediatric:ti,ab OR child:ti,ab,kw OR children:ti,ab,kw OR toddler\*:ti,ab,kw OR adolescen\*:ti,ab,kw OR teen\*:ti,ab,kw OR youth\*:ti,ab,kw OR boy:ti,ab,kw OR boys:ti,ab,kw OR girl\*:ti,ab,kw OR juvenile\*:ti,ab,kw) AND ('developing country'/exp OR 'low income country'/exp OR 'middle income country'/exp OR 'afghanistan'/exp OR 'albania'/exp OR 'algeria'/exp OR 'american samoa'/exp OR 'angola'/exp OR 'armenia'/exp OR 'azerbaijan'/exp OR 'bangladesh'/exp OR 'belarus'/exp OR 'belize'/exp OR 'benin'/exp OR 'bhutan'/exp OR 'bolivia'/exp OR 'bosnia and herzegovina'/exp OR 'botswana'/exp OR 'brazil'/exp OR 'bulgaria'/exp OR 'burkina faso'/exp OR 'burundi'/exp OR 'cape verde'/exp OR 'cambodia'/exp OR 'cameroon'/exp OR 'central african republic'/exp OR 'chad'/exp OR 'china'/exp OR 'colombia'/exp OR 'comoros'/exp OR 'democratic republic congo'/exp OR 'congo'/exp OR 'costa rica'/exp OR 'cote d'ivoire'/exp OR 'cuba'/exp OR 'djibouti'/exp OR 'dominica'/exp OR 'dominican republic'/exp OR 'ecuador'/exp OR 'egypt'/exp OR 'el salvador'/exp OR 'eritrea'/exp OR 'ethiopia'/exp OR 'equatorial guinea'/exp OR

'fiji'/exp OR 'gabon'/exp OR 'gambia'/exp OR 'ghana'/exp OR 'grenada'/exp OR 'guinea'/exp OR 'guinea-bissau'/exp OR 'guatemala'/exp OR 'guyana'/exp OR 'haiti'/exp OR 'honduras'/exp OR 'india'/exp OR 'indonesia'/exp OR 'iran'/exp OR 'iraq'/exp OR 'jamaica'/exp OR 'jordan'/exp OR 'kazakhstan'/exp OR 'kenya'/exp OR 'kiribati'/exp OR 'north korea'/exp OR 'kosovo'/exp OR 'kyrgyzstan'/exp OR 'laos'/exp OR 'lebanon'/exp OR 'lesotho'/exp OR 'liberia'/exp OR 'libyan arab jamahiriya'/exp OR 'madagascar'/exp OR 'malawi'/exp OR 'malaysia'/exp OR 'maldives'/exp OR 'mali'/exp OR 'marshall islands'/exp OR 'mauritania'/exp OR 'mauritius'/exp OR 'mexico'/exp OR 'federated states of micronesia'/exp OR 'moldova'/exp OR 'mongolia'/exp OR 'morocco'/exp OR 'mozambique'/exp OR 'myanmar'/exp OR 'namibia'/exp OR 'nauru'/exp OR 'nepal'/exp OR 'nicaragua'/exp OR 'niger'/exp OR 'nigeria'/exp OR 'pakistan'/exp OR 'papua new guinea'/exp OR 'paraguay'/exp OR 'peru'/exp OR 'philippines'/exp OR 'romania'/exp OR 'russian federation'/exp OR 'rwanda'/exp OR 'samoa'/exp OR 'sao tome and principe'/exp OR 'senegal'/exp OR 'serbia'/exp OR 'sierra leone'/exp OR 'solomon islands'/exp OR 'somalia'/exp OR 'south africa'/exp OR 'south sudan'/exp OR 'sri lanka'/exp OR 'saint lucia'/exp OR 'saint vincent and the grenadines'/exp OR 'sudan'/exp OR 'swaziland'/exp OR 'syrian arab republic'/exp OR 'tajikistan'/exp OR 'tanzania'/exp OR 'thailand'/exp OR 'timor-leste'/exp OR 'togo'/exp OR 'tonga'/exp OR 'tunisia'/exp OR 'turkey (republic)'/exp OR 'turkmenistan'/exp OR 'tuvalu'/exp OR 'uganda'/exp OR 'ukraine'/exp OR 'uzbekistan'/exp OR 'vanuatu'/exp OR 'venezuela'/exp OR 'viet nam'/exp OR 'yemen'/exp OR 'zambia'/exp OR 'zimbabwe'/exp OR 'developing country':ti,ab,kw OR 'developing countries':ti,ab,kw OR 'developing economy':ti,ab,kw OR 'under developed country':ti,ab,kw OR 'under developed countries':ti,ab,kw OR 'under developed economies':ti,ab,kw OR 'third world':ti,ab,kw OR 'low income country':ti,ab,kw OR 'low income economy':ti,ab,kw OR 'low income nation':ti,ab,kw OR 'lower income country':ti,ab,kw OR 'lower income economy':ti,ab,kw OR 'lower middle income country':ti,ab,kw OR 'middle income country':ti,ab,kw OR 'middle income economy':ti,ab,kw OR 'middle income nation':ti,ab,kw OR 'poor country':ti,ab,kw OR 'poor countries':ti,ab,kw OR 'lami country':ti,ab,kw OR 'lami countries':ti,ab,kw OR 'afghanistan':ti,ab,kw OR 'afghani\*':ti,ab,kw OR 'albania\*':ti,ab,kw OR 'algeria\*':ti,ab,kw OR 'american samoa':ti,ab,kw OR 'samoan\*':ti,ab,kw OR 'angola':ti,ab,kw OR 'angolan\*':ti,ab,kw OR 'armenia\*':ti,ab,kw OR 'azerbaijan\*':ti,ab,kw OR 'bangladesh':ti,ab,kw OR 'bengali\*':ti,ab,kw OR 'belarus\*':ti,ab,kw OR 'byelorussian':ti,ab,kw OR 'byelarus':ti,ab,kw OR 'belorussia':ti,ab,kw OR 'belize\*':ti,ab,kw OR 'benin\*':ti,ab,kw OR 'bhutan\*':ti,ab,kw OR 'bolivia\*':ti,ab,kw OR 'bosnia\*':ti,ab,kw OR 'herzegovina':ti,ab,kw OR 'botswana\*':ti,ab,kw OR 'bechuanaland':ti,ab,kw OR 'batswana':ti,ab,kw OR 'motswana':ti,ab,kw OR 'brazil\*':ti,ab,kw OR 'bulgaria\*':ti,ab,kw OR 'burkina faso':ti,ab,kw OR 'burkinese':ti,ab,kw OR 'burkinabé':ti,ab,kw OR 'burundi\*':ti,ab,kw OR 'cabo verde':ti,ab,kw OR 'cape verde':ti,ab,kw OR 'cape verdean':ti,ab,kw OR 'cabo verdean':ti,ab,kw OR 'cambodia\*':ti,ab,kw OR 'khmer':ti,ab,kw OR 'cameroon\*':ti,ab,kw OR 'cameroun':ti,ab,kw OR 'central african republic':ti,ab,kw OR 'centrafrican republic':ti,ab,kw OR 'chad':ti,ab,kw OR 'tchad':ti,ab,kw OR 'chadian':ti,ab,kw OR 'china':ti,ab,kw OR 'chinese':ti,ab,kw OR 'colombia\*':ti,ab,kw OR 'comoros':ti,ab,kw OR 'comoro islands':ti,ab,kw OR 'comorian':ti,ab,kw OR 'democratic republic of the congo':ti,ab,kw OR 'democratic republic congo':ti,ab,kw OR 'congo\*':ti,ab,kw OR 'costa rica':ti,ab,kw OR 'costa rican':ti,ab,kw OR 'cote d ivoire':ti,ab,kw OR 'ivory coast':ti,ab,kw OR 'ivorian':ti,ab,kw OR 'cuba\*':ti,ab,kw OR 'djibouti\*':ti,ab,kw OR 'dominica\*':ti,ab,kw OR 'dominican republic':ti,ab,kw OR 'french sudan':ti,ab,kw OR

ecuador\*:ti,ab,kw OR egypt\*:ti,ab,kw OR 'united arab republic':ti,ab,kw OR 'el salvador':ti,ab,kw OR salvador\*:ti,ab,kw OR eritrea\*:ti,ab,kw OR ethiopia\*:ti,ab,kw OR 'equatorial guinea':ti,ab,kw OR equatoguinean:ti,ab,kw OR fiji\*:ti,ab,kw OR gabon\*:ti,ab,kw OR gaboon:ti,ab,kw OR gambia\*:ti,ab,kw OR 'republic of georgia':ti,ab,kw OR 'georgia republic':ti,ab,kw OR 'georgia sssr':ti,ab,kw OR ghana\*:ti,ab,kw OR grenada:ti,ab,kw OR grenadian:ti,ab,kw OR guinea\*:ti,ab,kw OR 'guinea-bissau':ti,ab,kw OR 'portuguese guinea':ti,ab,kw OR 'bissau-guinean':ti,ab,kw OR guatemala\*:ti,ab,kw OR guyana:ti,ab,kw OR guyanese:ti,ab,kw OR haiti\*:ti,ab,kw OR hondura\*:ti,ab,kw OR india:ti,ab,kw OR 'indian union':ti,ab,kw OR indonesia\*:ti,ab,kw OR 'netherlands east indies':ti,ab,kw OR 'east indies':ti,ab,kw OR 'west irian':ti,ab,kw OR 'west new guinea':ti,ab,kw OR timor:ti,ab,kw OR java:ti,ab,kw OR 'irian jaya':ti,ab,kw OR bali:ti,ab,kw OR sumatra:ti,ab,kw OR celebes:ti,ab,kw OR sulawesi:ti,ab,kw OR 'malay archipelago':ti,ab,kw OR madoera:ti,ab,kw OR madura:ti,ab,kw OR iran\*:ti,ab,kw OR iraq\*:ti,ab,kw OR jamaica\*:ti,ab,kw OR jordan\*:ti,ab,kw OR kazakhstan\*:ti,ab,kw OR kazakh:ti,ab,kw OR kenya\*:ti,ab,kw OR kiribati\*:ti,ab,kw OR 'democratic peoples republic of korea':ti,ab,kw OR 'north korea':ti,ab,kw OR 'north korean':ti,ab,kw OR kosovo:ti,ab,kw OR kosovar:ti,ab,kw OR kosovan:ti,ab,kw OR kyrgyzstan\*:ti,ab,kw OR kirghizia:ti,ab,kw OR 'kyrgyz republic':ti,ab,kw OR 'kirghiz sssr':ti,ab,kw OR kirgizstan:ti,ab,kw OR kyrgyzs:ti,ab,kw OR lao\*:ti,ab,kw OR laotian\*:ti,ab,kw OR lebanon:ti,ab,kw OR lebanese:ti,ab,kw OR lesotho\*:ti,ab,kw OR basutoland:ti,ab,kw OR liberia\*:ti,ab,kw OR libya\*:ti,ab,kw OR macedonia\*:ti,ab,kw OR madagascar:ti,ab,kw OR malagasy:ti,ab,kw OR malawi\*:ti,ab,kw OR nyasaland:ti,ab,kw OR malaysia\*:ti,ab,kw OR malaya\*:ti,ab,kw OR maldives:ti,ab,kw OR maldivian:ti,ab,kw OR mali:ti,ab,kw OR Malian:ti,ab,kw OR 'marshall islands':ti,ab,kw OR mauritania\*:ti,ab,kw OR mauretania:ti,ab,kw OR mauritius:ti,ab,kw OR mauritian:ti,ab,kw OR mexico:ti,ab,kw OR mexican\*:ti,ab,kw OR micronesia\*:ti,ab,kw OR moldova\*:ti,ab,kw OR moldavia\*:ti,ab,kw OR mongolia\*:ti,ab,kw OR montenegro:ti,ab,kw OR montenegrin:ti,ab,kw OR morocco:ti,ab,kw OR ifni:ti,ab,kw OR moroccan:ti,ab,kw OR mozambique:ti,ab,kw OR 'portuguese east africa':ti,ab,kw OR mocambique:ti,ab,kw OR mozambican:ti,ab,kw OR myanmar:ti,ab,kw OR burma:ti,ab,kw OR myanma:ti,ab,kw OR burmese:ti,ab,kw OR namibia\*:ti,ab,kw OR nauru\*:ti,ab,kw OR nepal\*:ti,ab,kw OR nicaragua\*:ti,ab,kw OR niger\*:ti,ab,kw OR nigeria\*:ti,ab,kw OR pakistan\*:ti,ab,kw OR 'papua new guinea':ti,ab,kw OR 'east new guinea':ti,ab,kw OR paraguay\*:ti,ab,kw OR peru\*:ti,ab,kw OR philippines:ti,ab,kw OR philippines:ti,ab,kw OR filipino\*:ti,ab,kw OR romania\*:ti,ab,kw OR rumania\*:ti,ab,kw OR roumania\*:ti,ab,kw OR russia\*:ti,ab,kw OR rwanda\*:ti,ab,kw OR ruanda:ti,ab,kw OR samoa\*:ti,ab,kw OR 'navigator islands':ti,ab,kw OR 'sao tome principe':ti,ab,kw OR santomean:ti,ab,kw OR senegal\*:ti,ab,kw OR serbia\*:ti,ab,kw OR 'sierra leone':ti,ab,kw OR 'sierra leonean':ti,ab,kw OR 'solomon islands':ti,ab,kw OR 'solomon islander':ti,ab,kw OR somali\*:ti,ab,kw OR 'south africa':ti,ab,kw OR 'south african':ti,ab,kw OR 'south sudan':ti,ab,kw OR 'south sudanese':ti,ab,kw OR 'sri lanka':ti,ab,kw OR 'sri lankan':ti,ab,kw OR ceylon:ti,ab,kw OR 'saint lucia':ti,ab,kw OR 'st. lucia':ti,ab,kw OR 'saint lucian':ti,ab,kw OR 'saint vincent':ti,ab,kw OR 'st. vincent':ti,ab,kw OR grenadines:ti,ab,kw OR sudan\*:ti,ab,kw OR surinam\*:ti,ab,kw OR swaziland:ti,ab,kw OR 'swazi':ti,ab,kw OR eswatini:ti,ab,kw OR syria\*:ti,ab,kw OR tajikistan\*:ti,ab,kw OR tadjikistan\*:ti,ab,kw OR tadhik:ti,ab,kw OR tanzania\*:ti,ab,kw OR tanganyika:ti,ab,kw OR thai\*:ti,ab,kw OR 'timor-leste':ti,ab,kw OR 'east timor':ti,ab,kw OR

togo\*:ti,ab,kw OR tonga\*:ti,ab,kw OR tunisia\*:ti,ab,kw OR tunesia:ti,ab,kw OR turkey:ti,ab,kw OR turkish:ti,ab,kw OR turkmenistan:ti,ab,kw OR turkmen\*:ti,ab,kw OR tuvalu\*:ti,ab,kw OR uganda\*:ti,ab,kw OR ukraine:ti,ab,kw OR ukrainian:ti,ab,kw OR ukraina:ti,ab,kw OR uzbekistan\*:ti,ab,kw OR uzbek:ti,ab,kw OR vanuatu\*:ti,ab,kw OR venezuela\*:ti,ab,kw OR vietnam\*:ti,ab,kw OR 'viet nam':ti,ab,kw OR 'west bank':ti,ab,kw OR 'gaza':ti,ab,kw OR yemen\*:ti,ab,kw OR zambia\*:ti,ab,kw OR zimbabwe\*:ti,ab,kw)

## PubMed

(“Sepsis” [Mesh] OR sepsis[tiab] OR septic[tiab] OR pyemia\*[tiab] OR pyohemia\*[tiab] OR pyaemia\*[tiab] OR septicemia\*[tiab] OR “blood poisoning”[tiab]) AND (“Infant, Newborn”[Mesh] OR “Pediatrics”[Mesh] OR “Child”[Mesh] OR “Adolescent”[Mesh] OR infant[tiab] OR infants[tiab] OR baby[tiab] OR babies[tiab] OR newborn[tiab] OR newborns[tiab] OR neonate[tiab] OR neonates[tiab] OR pediatric [tiab] OR paediatric[tiab] OR child[tiab] OR children[tiab] OR toddler[tiab] OR toddlers[tiab] OR adolescent[tiab] OR adolescence[tiab] OR teen[tiab] OR teens[tiab] OR teenager[tiab] OR teenagers[tiab] OR youth[tiab] OR boy[tiab] OR boys[tiab] OR girl[tiab] OR girls[tiab] OR juvenile[tiab] OR juveniles[tiab]) AND (“Developing Countries”[Mesh] OR “Afghanistan”[Mesh] OR “Albania”[Mesh] OR “Algeria”[Mesh] OR “American Samoa”[Mesh] OR “Angola”[Mesh] OR “Armenia”[Mesh] OR “Azerbaijan”[Mesh] OR “Bangladesh”[Mesh] OR “Republic of Belarus”[Mesh] OR “Belize”[Mesh] OR “Benin”[Mesh] OR “Bhutan”[Mesh] OR “Bolivia”[Mesh] OR “Bosnia and Herzegovina”[Mesh] OR “Botswana”[Mesh] OR “Brazil”[Mesh] OR “Bulgaria”[Mesh] OR “Burkina Faso”[Mesh] OR “Burundi”[Mesh] OR “Cabo Verde”[Mesh] OR “Cambodia”[Mesh] OR “Cameroon”[Mesh] OR “Central African Republic”[Mesh] OR “Chad”[Mesh] OR “China”[Mesh:NoExp] OR “Colombia”[Mesh] OR “Comoros”[Mesh] OR “Democratic Republic of the Congo”[Mesh] OR “Congo”[Mesh] OR “Costa Rica”[Mesh] OR “Cote d’Ivoire”[Mesh] OR “Cuba”[Mesh] OR “Djibouti”[Mesh] OR “Dominica”[Mesh] OR “Dominican Republic”[Mesh] OR “Ecuador”[Mesh] OR “Egypt”[Mesh] OR “El Salvador”[Mesh] OR “Eritrea”[Mesh] OR “Ethiopia”[Mesh] OR “Equatorial Guinea”[Mesh] OR “Fiji”[Mesh] OR “Gabon”[Mesh] OR “Gambia”[Mesh] OR “Georgia (Republic)”[Mesh] OR “Ghana”[Mesh] OR “Grenada”[Mesh] OR “Guinea”[Mesh] OR “Guinea-Bissau”[Mesh] OR “Guatemala”[Mesh] OR “Guyana”[Mesh] OR “Haiti”[Mesh] OR “Honduras”[Mesh] OR “India”[Mesh] OR “Indonesia”[Mesh] OR “Iran”[Mesh] OR “Iraq”[Mesh] OR “Jamaica”[Mesh] OR “Jordan”[Mesh] OR “Kazakhstan”[Mesh] OR “Kenya”[Mesh] OR “Democratic People’s Republic of Korea”[Mesh] OR “Kosovo”[Mesh] OR “Kyrgyzstan”[Mesh] OR “Laos”[Mesh] OR “Lebanon”[Mesh] OR “Lesotho”[Mesh] OR “Liberia”[Mesh] OR “Libya”[Mesh] OR “Macedonia (Republic)”[Mesh] OR “Madagascar”[Mesh] OR “Malawi”[Mesh] OR “Malaysia”[Mesh] OR “Mali”[Mesh] OR “Mauritania”[Mesh] OR “Mauritius”[Mesh] OR “Mexico”[Mesh] OR “Micronesia”[Mesh] OR “Moldova”[Mesh] OR “Mongolia”[Mesh] OR “Montenegro”[Mesh] OR “Morocco”[Mesh] OR “Mozambique”[Mesh] OR “Myanmar”[Mesh] OR “Namibia”[Mesh] OR “Nepal”[Mesh] OR “Nicaragua”[Mesh] OR “Niger”[Mesh] OR “Nigeria”[Mesh] OR “Pakistan”[Mesh] OR “Papua New Guinea”[Mesh] OR “Paraguay”[Mesh] OR “Peru”[Mesh] OR “Philippines”[Mesh] OR “Romania”[Mesh] OR

"Russia"[Mesh] OR "Rwanda"[Mesh] OR "Samoa"[Mesh] OR "Sao Tome and Principe"[Mesh] OR "Senegal"[Mesh] OR "Serbia"[Mesh] OR "Sierra Leone"[Mesh] OR "Somalia"[Mesh] OR "South Africa"[Mesh] OR "South Sudan"[Mesh] OR "Sri Lanka"[Mesh] OR "Saint Lucia"[Mesh] OR "Saint Vincent and the Grenadines"[Mesh] OR "Sudan"[Mesh] OR "Suriname"[Mesh] OR "Swaziland"[Mesh] OR "Syria"[Mesh] OR "Tajikistan"[Mesh] OR "Tanzania"[Mesh] OR "Thailand"[Mesh] OR "Timor-Leste"[Mesh] OR "Togo"[Mesh] OR "Tonga"[Mesh] OR "Tunisia"[Mesh] OR "Turkey"[Mesh] OR "Turkmenistan"[Mesh] OR "Uganda"[Mesh] OR "Ukraine"[Mesh] OR "Uzbekistan"[Mesh] OR "Vanuatu"[Mesh] OR "Venezuela"[Mesh] OR "Vietnam"[Mesh] OR "Yemen"[Mesh] OR "Zambia"[Mesh] OR "Zimbabwe"[Mesh] OR "developing country" OR "developing countries" OR "developing economy" OR "under developed country" OR "under developed countries" OR "third world" OR "low income country" OR "low income economy" OR "low income nation" OR "lower income country" OR "lower middle income country" OR "middle income country" OR "middle income economy" OR "middle income nation" OR "poor country" OR "poor countries" OR "LAMI country" OR "LAMI countries" OR Afghanistan[tiab] OR Afghani\*[tiab] OR Albania\*[tiab] OR Algeria\*[tiab] OR "American Samoa"[tiab] OR Samoan\*[tiab] OR Angola[tiab] OR Angolan\*[tiab] OR Armenia\*[tiab] OR Azerbaijan\*[tiab] OR Bangladesh[tiab] OR Bengali\*[tiab] OR Belarus\*[tiab] OR Byelorussian[tiab] OR Byelarus[tiab] OR Belorussia[tiab] OR Belize\*[tiab] OR Benin\*[tiab] OR Bhutan\*[tiab] OR Bolivia\*[tiab] OR Bosnia\*[tiab] OR Herzegovina[tiab] OR Botswana\*[tiab] OR Bechuanaland[tiab] OR Batswana[tiab] OR Motswana[tiab] OR Brazil\*[tiab] OR Bulgaria\*[tiab] OR "Burkina Faso"[tiab] OR Burkinabé[tiab] OR Burundi\*[tiab] OR "Cabo Verde"[tiab] OR "Cape Verde"[tiab] OR "Cape Verdean"[tiab] OR Cambodia\*[tiab] OR Khmer[tiab] OR Cameroon\*[tiab] OR Cameroun[tiab] OR "Central African Republic"[tiab] OR "Centrafrican Republic"[tiab] OR "Chad"[tiab] OR Tchad [tiab] OR Chadian[tiab] OR China[tiab] OR Chinese[tiab] OR Colombia\*[tiab] OR Comoros[tiab] OR "Comoro Islands"[tiab] OR Comorian[tiab] OR "Democratic Republic of the Congo"[tiab] OR "Democratic Republic Congo"[tiab] OR Congo\*[tiab] OR "Costa Rica"[tiab] OR "Costa Rican"[tiab] OR "Cote d'Ivoire"[tiab] OR "Ivory Coast"[tiab] OR Ivorian[tiab] OR Cuba\*[tiab] OR Djibouti\*[tiab] OR Dominica\*[tiab] OR "Dominican Republic"[tiab] OR "French Sudan"[tiab] OR Ecuador\*[tiab] OR Egypt\*[tiab] OR "United Arab Republic"[tiab] OR "El Salvador"[tiab] OR Salvador\*[tiab] OR Eritrea\*[tiab] OR Ethiopia\*[tiab] OR "Equatorial Guinea"[tiab] OR Equatoguinean[tiab] OR Fiji\*[tiab] OR Gabon\*[tiab] OR Gaboon[tiab] OR Gambia\*[tiab] OR "Republic of Georgia"[tiab] OR "Georgia SSR"[tiab] OR Ghana\*[tiab] OR Grenada[tiab] OR Grenadian[tiab] OR Guinea\*[tiab] OR "Guinea-Bissau"[tiab] OR "Portuguese Guinea"[tiab] OR Guatemala\*[tiab] OR Guyana[tiab] OR Guyanese[tiab] OR Haiti\*[tiab] OR Hondura\*[tiab] OR India[tiab] OR "Indian Union"[tiab] OR Indonesia\*[tiab] OR "Netherlands East Indies"[tiab] OR "East Indies"[tiab] OR "West Irian"[tiab] OR "West New Guinea"[tiab] OR Timor[tiab] OR "Java"[tiab] OR "Irian Jaya"[tiab] OR Bali[tiab] OR Sumatra[tiab] OR Celebes[tiab] OR Sulawesi[tiab] OR "Malay Archipelago"[tiab] OR Madura[tiab] OR Iran\*[tiab] OR Iraq\*[tiab] OR Jamaica\*[tiab] OR Jordan\*[tiab] OR Kazakhstan\*[tiab] OR Kazakh[tiab] OR Kenya\*[tiab] OR Kiribati\*[tiab] OR "Democratic People's Republic of Korea"[tiab] OR "North Korea"[tiab] OR "North Korean"[tiab] OR Kosovo[tiab] OR Kosovar[tiab] OR Kosovan[tiab] OR Kyrgyzstan\*[tiab] OR Kirghizia[tiab] OR "Kyrgyz Republic"[tiab] OR "Kirghiz SSR"[tiab] OR Kirgizstan[tiab] OR Kyrgyzs[tiab] OR

Lao[tiab] OR Laos[tiab] OR Laotian\*[tiab] OR Lebanon[tiab] OR Lebanese[tiab] OR Lesotho\*[tiab] OR Basutoland[tiab] OR Liberia\*[tiab] OR Libya\*[tiab] OR Macedonia\*[tiab] OR Madagascar[tiab] OR Malagasy[tiab] OR Malawi\*[tiab] OR Nyasaland[tiab] OR Malaysia\*[tiab] OR Malaya\*[tiab] OR Maldives[tiab] OR Maldivian[tiab] OR Mali[tiab] OR Malian[tiab] OR “Marshall Islands”[tiab] OR Mauritania\*[tiab] OR Mauretania[tiab] OR Mauritius[tiab] OR Mauritian[tiab] OR Mexico[tiab] OR Mexican\*[tiab] OR Micronesia\*[tiab] OR Moldova\*[tiab] OR Moldavia\*[tiab] OR Mongolia\*[tiab] OR Montenegro[tiab] OR Montenegrin[tiab] OR Morocco[tiab] OR Ifni[tiab] OR Moroccan[tiab] OR Mozambique[tiab] OR “Portuguese East Africa”[tiab] OR Mocambique[tiab] OR Mozambican[tiab] OR Myanmar[tiab] OR Burma[tiab] OR Myanma[tiab] OR Burmese[tiab] OR Namibia\*[tiab] OR Nauru\*[tiab] OR Nepal\*[tiab] OR Nicaragua\*[tiab] OR Niger\*[tiab] OR Nigeria\*[tiab] OR Pakistan\*[tiab] OR “Papua New Guinea”[tiab] OR “East New Guinea” [tiab] OR Paraguay\*[tiab] OR Peru\*[tiab] OR Philippines[tiab] OR Phillipines[tiab] OR Filipino\*[tiab] OR Romania\*[tiab] OR Rumania\*[tiab] OR Roumania\*[tiab] OR Russia\*[tiab] OR Rwanda\*[tiab] OR Ruanda[tiab] OR Samoa\*[tiab] OR “Sao Tome”[tiab] OR Senegal\*[tiab] OR Serbia\*[tiab] OR “Sierra Leone”[tiab] OR “Sierra Leonean” [tiab] OR “Solomon Islands” [tiab] OR “Solomon Islander” [tiab] OR Somali\*[tiab] OR “South Africa”[tiab] OR “South African” [tiab] OR “South Sudan”[tiab] OR “South Sudanese” [tiab] OR “Sri Lanka”[tiab] OR “Sri Lankan” [tiab] OR Ceylon[tiab] OR “Saint Lucia”[tiab] OR “St. Lucia”[tiab] OR “Saint Vincent”[tiab] OR “St. Vincent”[tiab] OR Sudan\* [tiab] OR Surinam\*[tiab] OR Swaziland[tiab] OR “Swazi”[tiab] OR Eswatini[tiab] OR Syria\*[tiab] OR Tajikistan\*[tiab] OR Tadjikistan\*[tiab] OR Tadjhik[tiab] OR Tanzania\*[tiab] OR Tanganyika[tiab] OR Thai\*[tiab] OR “Timor-Leste”[tiab] OR “East Timor” [tiab] OR Togo\*[tiab] OR Tonga\*[tiab] OR Tunisia\*[tiab] OR Tunesia[tiab] OR Turkey[tiab] OR Turkish[tiab] OR Turkmenistan[tiab] OR Turkmen\*[tiab] OR Tuvalu\*[tiab] OR Uganda\*[tiab] OR Ukraine[tiab] OR Ukrainian[tiab] OR Ukraina[tiab] OR Uzbekistan\*[tiab] OR Uzbek[tiab] OR Vanuatu\*[tiab] OR Venezuela\*[tiab] OR Vietnam\*[tiab] OR “Viet Nam” [tiab] OR “West Bank” [tiab] OR “Gaza” [tiab] OR Yemen\*[tiab] OR Zambia\*[tiab] OR Zimbabwe\*[tiab]

### Scopus

≡ 6,164 results after limiting to English, 1994-present and excluding books, book chapters, editorials, notes, and letters on 6/24/2019

TITLE-ABS-KEY ( sepsis OR septic OR pyemia\* OR pyohemia\* OR pyaemia\* OR septicemia\* OR {blood poisoning} ) AND TITLE-ABS-KEY ( infant OR infants OR baby OR babies OR newborn OR newborns OR neonate OR neonates OR pediatric OR paediatric OR child OR children OR toddler OR toddlers OR adolescent OR adolescence OR teen OR teens OR teenager OR teenagers OR youth OR boy OR boys OR girl OR girls OR juvenile OR juveniles ) AND TITLE-ABS-KEY ( {developing country} OR {developing countries} OR {developing economy} OR {under developed country} OR {under developed countries} OR {third world} OR {low income country} OR {low income economy} OR {low income nation} OR {lower income country} OR {lower middle income country} OR {middle income country} OR {middle income economy} OR {middle income nation} OR {poor

country} OR {poor countries} OR {LAMI country} OR {LAMI countries} OR afghanistan OR afghani\* OR albania\* OR algeria\* OR {American Samoa} OR samoan\* OR angola OR angolan\* OR armenia\* OR azerbaijan\* OR bangladesh OR bengali\* OR belarus\* OR byelorussian OR byelarus OR belorussia OR belize\* OR benin\* OR bhutan\* OR bolivia\* OR bosnia\* OR herzegovina OR botswana\* OR bechuanaland OR batswana OR motswana OR brazil\* OR bulgaria\* OR "Burkina Faso" OR burkinabé OR burundi\* OR "Cabo Verde" OR "Cape Verde" OR "Cape Verdean" OR cambodia\* OR khmer OR cameroon\* OR cameroun OR "Central African Republic" OR "Centrafrican Republic" OR "Chad" OR tchad OR chadian OR china OR chinese OR colombia\* OR comoros OR "Comoro Islands" OR comorian OR "Democratic Republic of the Congo" OR "Democratic Republic Congo" OR congo\* OR "Costa Rica" OR "Costa Rican" OR "Cote d'Ivoire" OR "Ivory Coast" OR ivorian OR cuba\* OR djibouti\* OR dominica\* OR "Dominican Republic" OR "French Sudan" OR ecuador\* OR egypt\* OR "United Arab Republic" OR "El Salvador" OR salvador\* OR eritrea\* OR ethiopia\* OR "Equatorial Guinea" OR equatoguinean OR fiji\* OR gabon\* OR gaboon OR gambia\* OR "Republic of Georgia" OR "Georgia SSR" OR ghana\* OR grenada OR grenadian OR guinea\* OR "Guinea-Bissau" OR "Portuguese Guinea" OR guatemala\* OR guyana OR guyanese OR haiti\* OR hondura\* OR india OR "Indian Union" OR indonesia\* OR "Netherlands East Indies" OR "East Indies" OR "West Irian" OR "West New Guinea" OR timor OR "Java" OR "Irian Jaya" OR bali OR sumatra OR celebes OR sulawesi OR "Malay Archipelago" OR madura OR iran\* OR iraq\* OR jamaica\* OR jordan\* OR kazakhstan\* OR kazakh OR kenya\* OR kiribati\* OR "Democratic People's Republic of Korea" OR "North Korea" OR "North Korean" OR kosovo OR kosovar OR kosovan OR kyrgyzstan\* OR kirghizia OR "Kyrgyz Republic" OR "Kirghiz SSR" OR kirgizstan OR kyrgyzs OR lao OR laos OR laotian\* OR lebanon OR lebanese OR lesotho\* OR basutoland OR liberia\* OR libya\* OR macedonia\* OR madagascar OR malagasy OR malawi\* OR nyasaland OR malaysia\* OR malaya\* OR maldives OR maldivian OR mali OR malian OR "Marshall Islands" OR mauritania\* OR mauretania OR mauritius OR mauritian OR mexico OR mexican\* OR micronesia\* OR moldova\* OR moldavia\* OR mongolia\* OR montenegro OR montenegrin OR morocco OR ifni OR moroccan OR mozambique OR "Portuguese East Africa" OR mocambique OR mozambican OR myanmar OR burma OR myanma OR burmese OR namibia\* OR nauru\* OR nepal\* OR nicaragua\* OR niger\* OR nigeria\* OR pakistan\* OR "Papua New Guinea" OR "East New Guinea" OR paraguay\* OR peru\* OR philippines OR philippines OR filipino\* OR romania\* OR rumania\* OR roumania\* OR russia\* OR rwanda\* OR ruanda OR samoa\* OR "Sao Tome" OR senegal\* OR serbia\* OR "Sierra Leone" OR "Sierra Leonean" OR "Solomon Islands" OR "Solomon Islander" OR somali\* OR "South Africa" OR "South African" OR "South Sudan" OR "South Sudanese" OR "Sri Lanka" OR "Sri Lankan" OR ceylon OR "Saint Lucia" OR "St. Lucia" OR "Saint Vincent" OR "St. Vincent" OR sudan\* OR surinam\* OR swaziland OR "Swazi" OR eswatini OR syria\* OR tajikistan\* OR tadjikistan\* OR tadjik OR tanzania\* OR tanganyika OR thai\* OR "Timor-Leste" OR "East Timor" OR togo\* OR tonga\* OR tunisia\* OR tunesia OR turkey OR turkish OR turkmenistan OR turkmen\* OR tuvalu\* OR uganda\* OR ukraine OR ukrainian OR ukraine OR uzbekistan\* OR uzbek OR vanuatu\* OR venezuela\* OR vietnam\* OR "Viet Nam" OR "West Bank" OR "Gaza" OR yemen\* OR

zambia\* OR zimbabwe\*) AND (LIMIT-TO(LANGUAGE, "English")) AND (LIMIT-TO(PUBYEAR, 2019) OR LIMIT-TO(PUBYEAR, 2018) OR LIMIT-TO(PUBYEAR, 2017) OR LIMIT-TO(PUBYEAR, 2016) OR LIMIT-TO(PUBYEAR, 2015) OR LIMIT-TO(PUBYEAR, 2014) OR LIMIT-TO(PUBYEAR, 2013) OR LIMIT-TO(PUBYEAR, 2012) OR LIMIT-TO(PUBYEAR, 2011) OR LIMIT-TO(PUBYEAR, 2010) OR LIMIT-TO(PUBYEAR, 2009) OR LIMIT-TO(PUBYEAR, 2008) OR LIMIT-TO(PUBYEAR, 2007) OR LIMIT-TO(PUBYEAR, 2006) OR LIMIT-TO(PUBYEAR, 2005) OR LIMIT-TO(PUBYEAR, 2004) OR LIMIT-TO(PUBYEAR, 2003) OR LIMIT-TO(PUBYEAR, 2002) OR LIMIT-TO(PUBYEAR, 2001) OR LIMIT-TO(PUBYEAR, 2000) OR LIMIT-TO(PUBYEAR, 1999) OR LIMIT-TO(PUBYEAR, 1998) OR LIMIT-TO(PUBYEAR, 1997) OR LIMIT-TO(PUBYEAR, 1996) OR LIMIT-TO(PUBYEAR, 1995) OR LIMIT-TO(PUBYEAR, 1994)) AND (EXCLUDE(DOCTYPE, "no") OR EXCLUDE(DOCTYPE, "ed") OR EXCLUDE(DOCTYPE, "ch") OR EXCLUDE(DOCTYPE, "sh") OR EXCLUDE(DOCTYPE, "bk"))

#### Cochrane Library

#1: MeSH descriptor: [Sepsis] explode all trees

#2: sepsis OR septic OR pyemia\* OR pyohemia\* OR pyaemia\* OR septicemia\* OR "blood poisoning"

#3: #1 OR #2

#4: MeSH descriptor: [Infant, Newborn] explode all trees

#5: MeSH descriptor: [Pediatrics] explode all trees

#6: MeSH descriptor: [Child] explode all trees

#7: MeSH descriptor: [Adolescent] explode all trees

#8: infant OR infants OR baby OR babies OR newborn OR newborns OR neonate OR neonates OR pediatric OR paediatric OR child OR children OR toddler OR toddlers OR adolescent OR adolescence OR teen OR teens OR teenager OR teenagers OR youth OR boy OR boys OR girl OR girls OR juvenile OR juveniles

#9: #4 OR #5 OR #6 OR #7 OR #8

#10: MeSH descriptor: [Developing Countries] explode all trees

#11: ("developing country" OR "developing countries" OR "developing economy" OR "under developed country" OR "under developed countries" OR "third world" OR "low income country" OR "low income economy" OR "low income nation" OR "lower income country" OR "lower middle income country" OR "middle income country" OR "middle income economy" OR "middle income nation" OR "poor country" OR "poor countries" OR "LAMI country" OR "LAMI countries" OR Afghanistan OR Afghani\* OR Albania\* OR Algeria\* OR "American Samoa" OR



Samoan\* OR Angola OR Angolan\* OR Armenia\* OR Azerbaijan\* OR Bangladesh OR Bengali\* OR Belarus\* OR Byelorussian OR Byelarus OR Belorussia OR Belize\* OR Benin\* OR Bhutan\* OR Bolivia\* OR Bosnia\* OR Herzegovina OR Botswana\* OR Bechuanaland OR Batswana OR Motswana OR Brazil\* OR Bulgaria\* OR "Burkina Faso" OR Burkinabé OR Burundi\* OR "Cabo Verde" OR "Cape Verde" OR "Cape Verdean" OR Cambodia\* OR Khmer OR Cameroon\* OR Cameroun OR "Central African Republic" OR "Centrafican Republic" OR "Chad" OR Tchad OR Chadian OR China OR Chinese OR Colombia\* OR Comoros OR "Comoro Islands" OR Comorian OR "Democratic Republic of the Congo" OR "Democratic Republic Congo" OR Congo\* OR "Costa Rica" OR "Costa Rican" OR "Cote d Ivoire" OR "Ivory Coast" OR Ivorian OR Cuba\* OR Djibouti\* OR Dominica\* OR "Dominican Republic" OR "French Sudan" OR Ecuador\* OR Egypt\* OR "United Arab Republic" OR "El Salvador" OR Salvador\* OR Eritrea\* OR Ethiopia\* OR "Equatorial Guinea" OR Equatoguinean OR Fiji\* OR Gabon\* OR Gaboon OR Gambia\* OR "Republic of Georgia" OR "Georgia SSR" OR Ghana\* OR Grenada OR Grenadian OR Guinea\* OR "Guinea-Bissau" OR "Portuguese Guinea" OR Guatemala\* OR Guyana OR Guyanese OR Haiti\* OR Hondura\* OR India OR "Indian Union" OR Indonesia\* OR "Netherlands East Indies" OR "East Indies" OR "West Irian" OR "West New Guinea" OR Timor OR "Java" OR "Irian Jaya" OR Bali OR Sumatra OR Celebes OR Sulawesi OR "Malay Archipelago" OR Madura OR Iran\* OR Iraq\* OR Jamaica\* OR Jordan\* OR Kazakhstan\* OR Kazakh OR Kenya\* OR Kiribati\* OR "Democratic People's Republic of Korea" OR "North Korea" OR "North Korean" OR Kosovo OR Kosovar OR Kosovan OR Kyrgyzstan\* OR Kirghizia OR "Kyrgyz Republic" OR "Kirghiz SSR" OR Kirgizstan OR Kyrgyz OR Lao OR Laos OR Laotian\* OR Lebanon OR Lebanese OR Lesotho\* OR Basutoland OR Liberia\* OR Libya\* OR Macedonia\* OR Madagascar OR Malagasy OR Malawi\* OR Nyasaland OR Malaysia\* OR Malaya\* OR Maldives OR Maldivian OR Mali OR Malian OR "Marshall Islands" OR Mauritania\* OR Mauretania OR Mauritius OR Mauritian OR Mexico OR Mexican\* OR Micronesia\* OR Moldova\* OR Moldavia\* OR Mongolia\* OR Montenegro OR Montenegrin OR Morocco OR Ifni OR Moroccan OR Mozambique OR "Portuguese East Africa" OR Mocambique OR Mozambican OR Myanmar OR Burma OR Myanma OR Burmese OR Namibia\* OR Nauru\* OR Nepal\* OR Nicaragua\* OR Niger\* OR Nigeria\* OR Pakistan\* OR "Papua New Guinea" OR "East New Guinea" OR Paraguay\* OR Peru\* OR Philippines OR Phillipines OR Filipino\* OR Romania\* OR Rumania\* OR Roumania\* OR Russia\* OR Rwanda\* OR Ruanda OR Samoa\* OR "Sao Tome" OR Senegal\* OR Serbia\* OR "Sierra Leone" OR "Sierra Leonean" OR "Solomon Islands" OR "Solomon Islander" OR Somali\* OR "South Africa" OR "South African" OR "South Sudan" OR "South Sudanese" OR "Sri Lanka" OR "Sri Lankan" OR Ceylon OR "Saint Lucia" OR "Saint Vincent" OR Sudan\* OR Surinam\* OR Swaziland OR Swazi OR Eswatini OR Syria\* OR Tajikistan\* OR Tadjikistan\* OR Tadjhik OR Tanzania\* OR Tanganyika OR Thai\* OR "Timor Leste" OR "East Timor" OR Togo\* OR Tonga\* OR Tunisia\* OR Tunesia OR Turkey OR Turkish OR Turkmenistan OR Turkmen\* OR Tuvalu\* OR Uganda\* OR Ukraine OR Ukrainian OR Ukraina OR Uzbekistan\* OR Uzbek OR Vanuatu\* OR Venezuela\* OR Vietnam\* OR "Viet Nam" OR "West Bank" OR "Gaza" OR Yemen\* OR Zambia\* OR Zimbabwe\*)

#12: #10 OR #11

#13: #3 AND #9 AND #12
